# Supplementary material
Source: HighWire-hosted journal article supplement (https://www.cmajopen.ca/highwire/filestream/89209/field_highwire_adjunct_files/9/open-2022-0006-strobe-checklist.pdf)
Supplement: open-2022-0006-strobe-checklist.pdf [file open-2022-0006-strobe-checklist.pdf]

STROBE (STrengthening the Reporting of OBservational studies in Epidemiology) Statement\*

| Section/topic                | Item No                       | Recommendation                                                                                                                                                      | Page number                      |
|------------------------------|-------------------------------|---------------------------------------------------------------------------------------------------------------------------------------------------------------------|----------------------------------|
| <b>Title and abstract</b>    | <input type="checkbox"/> 1    | Indicate the use of propensity analysis with a commonly used term in the title or the abstract                                                                      | Title page                       |
|                              | <input type="checkbox"/> 2    | Provide in the abstract an informative and balanced summary of what was done and what was found                                                                     | Abstract                         |
| <b>Introduction</b>          |                               |                                                                                                                                                                     |                                  |
| Background/rationale         | <input type="checkbox"/> 3    | Explain the scientific background and rationale for the investigation being reported                                                                                | 1                                |
| Objectives                   | <input type="checkbox"/> 4    | State specific objectives, including any prespecified hypotheses                                                                                                    | 1                                |
| <b>Methods</b>               |                               |                                                                                                                                                                     |                                  |
| Setting                      | <input type="checkbox"/> 5    | Describe the setting, locations, and relevant dates, including periods of recruitment, treatment, follow-up, and data collection                                    | 1, 2                             |
| Patient selection            | <input type="checkbox"/> 6    | Give the eligibility criteria, and the sources and methods of subject ascertainment and selection                                                                   | 1                                |
| Variables                    | <input type="checkbox"/> 7    | Clearly define all outcomes, treatments, predictors. Give diagnostic criteria, if applicable                                                                        | 2-4<br>Appendix 5                |
| Data sources/<br>measurement | <input type="checkbox"/> 8    | For each variable of interest, give sources of data and details of methods of assessment (measurement)                                                              | 2, 3 (appendix 3;<br>appendix 4) |
| Bias                         | <input type="checkbox"/> 9    | Describe how propensity score analysis was used to address bias                                                                                                     | 3-4                              |
|                              | <input type="checkbox"/> 10   | Describe any other methods to address potential sources of bias, e.g. sensitivity analysis                                                                          | 4                                |
| Sample size                  | <input type="checkbox"/> 11   | Explain how the study size was arrived at                                                                                                                           | 2                                |
| Statistical analyses         | <input type="checkbox"/> 12   | Describe all the analytic methods, including the propensity score methods, e.g. matching, weighting, stratification, or covariate adjustment using propensity score | 3 (RCT), 3-4<br>(Propensity)     |
|                              | <input type="checkbox"/> 13   | Indicate the model used to estimate propensity score, e.g. logistic model, boosting (meta-classifiers), decision trees                                              | 3-4                              |
|                              | <input type="checkbox"/> 14   | State the variables included in the propensity score model                                                                                                          | 3-4                              |
|                              | <input type="checkbox"/> 15   | Explain the variable selection procedure for propensity score model                                                                                                 | 3                                |
|                              | <input type="checkbox"/> 16   | For propensity score matching:                                                                                                                                      |                                  |
|                              | <input type="checkbox"/> 16.1 | Explicitly state the matching algorithm and distance metric                                                                                                         | 4                                |

|                          |      |                                                                                                                                     |     |
|--------------------------|------|-------------------------------------------------------------------------------------------------------------------------------------|-----|
| <input type="checkbox"/> | 16.2 | Indicate matching ratio (1:m matching)                                                                                              | 2   |
| <input type="checkbox"/> | 16.3 | Indicate whether sampling with or without replacement was used                                                                      | 3   |
| <input type="checkbox"/> | 16.4 | Describe the statistical methods for the analysis of matched data                                                                   | 4   |
| <input type="checkbox"/> | 16.5 | Describe methods for assessing the comparability of baseline characteristics in the matched groups                                  | 4   |
| <input type="checkbox"/> | 17   | For propensity score weighting, describe methods for assessing the comparability of baseline characteristics in the weighted groups | N/A |
|                          | 18   | For propensity score stratification:                                                                                                | N/A |
| <input type="checkbox"/> | 18.1 | Give the number of strata                                                                                                           |     |
| <input type="checkbox"/> | 18.2 | Describe methods for assessing the comparability of baseline characteristics in each stratum                                        |     |
| <input type="checkbox"/> | 19   | Explain how assumption of propensity score analysis was examined                                                                    | 4   |
| <input type="checkbox"/> | 20   | Explain how missing data were addressed, including missing data in propensity score estimation                                      | 3   |
| <input type="checkbox"/> | 21   | If applicable, describe any methods used to examine subgroups and interactions                                                      | N/A |
| <input type="checkbox"/> | 22   | Describe any sensitivity analyses                                                                                                   | 4   |
| <input type="checkbox"/> | 23   | Indicate the software used for analysis                                                                                             | 2   |
| <input type="checkbox"/> | 24   | If applicable, report the package used to create matched sample, e.g. GMATCH macro in SAS, MatchIt package®, Optmatch package ®     | 2   |

---

## Results

|                         |                               |                                                                                                         |          |
|-------------------------|-------------------------------|---------------------------------------------------------------------------------------------------------|----------|
| Participants            | 25                            | Report numbers of participants at each stage of study:                                                  |          |
|                         | <input type="checkbox"/> 25.1 | sample size of patients potentially eligible                                                            | Figure 1 |
|                         | <input type="checkbox"/> 25.2 | sample size of patients confirmed eligible and included                                                 | Figure 1 |
|                         | <input type="checkbox"/> 25.3 | sample size of patients analyzed                                                                        | Figure 1 |
|                         | <input type="checkbox"/> 25.4 | for propensity score matching, sample size for each treatment group before and after matching           | Figure 1 |
| Patient characteristics | <input type="checkbox"/> 26   | Explain reasons for exclusion at each stage                                                             | Figure 1 |
|                         | <input type="checkbox"/> 27   | Consider use of a flow diagram                                                                          | Figure 1 |
|                         | <input type="checkbox"/> 28   | Describe the distribution of baseline characteristics for each group before propensity score analysis   | Table 3  |
|                         | 29                            | For propensity score matching, weighting, or stratification:                                            |          |
|                         | <input type="checkbox"/> 29.1 | Describe the distribution of baseline characteristics in the matched/weighted groups or in each stratum | Table 3  |

|                          |                          |      |                                                                                                                                                                                 |                            |
|--------------------------|--------------------------|------|---------------------------------------------------------------------------------------------------------------------------------------------------------------------------------|----------------------------|
|                          | <input type="checkbox"/> | 29.2 | Describe the results of the comparability of baseline characteristics, whether there are still systematic differences between treatment groups                                  | 5. Table 3 and 6           |
|                          | <input type="checkbox"/> | 30   | Indicate number of patients with missing data for each variable of interest, especially the variables used in propensity score model                                            | Table 1                    |
| Outcome data             | <input type="checkbox"/> | 31   | Report outcomes of each treatment group                                                                                                                                         | 5/ Table 2 (RCT)           |
| Main results             | <input type="checkbox"/> | 32   | Give propensity score analysis estimates and their precision, e.g. 95% confidence interval                                                                                      | 5/ Table 4<br>(Propensity) |
|                          | <input type="checkbox"/> | 33   | If applicable, give unadjusted estimates and/or adjusted estimates and their precision, e.g. 95% confidence interval. Make clear which additional factors were adjusted for     | N/A                        |
| Other analyses           | <input type="checkbox"/> | 34   | Report other analyses done, e.g. analyses of subgroups and interactions, and sensitivity analyses                                                                               | N/A                        |
| <b>Discussion</b>        |                          |      |                                                                                                                                                                                 |                            |
| Key results              | <input type="checkbox"/> | 35   | Summarize key results with reference to study objectives                                                                                                                        | 5-6                        |
| Limitations              | <input type="checkbox"/> | 36   | Discuss limitations of the study, taking into account sources of potential bias or imprecision                                                                                  | 6-7                        |
|                          | <input type="checkbox"/> | 37   | Discuss both direction and magnitude of any potential bias                                                                                                                      | 7                          |
| Interpretation           | <input type="checkbox"/> | 38   | Discuss whether imbalance of baseline characteristics still exists, and give a cautious interpretation                                                                          | N/A                        |
|                          | <input type="checkbox"/> | 39   | Give a cautious overall interpretation of results considering objectives, limitations, multiplicity of analyses, results from similar studies, and other relevant evidence      | 6                          |
| Generalizability         | <input type="checkbox"/> | 40   | For propensity score matching, discuss the possibility and potential influence of incomplete matching, especially the studies in which the matched sample size is less than 50% | N/A                        |
| <b>Other information</b> |                          |      |                                                                                                                                                                                 |                            |
| Funding                  | <input type="checkbox"/> | 41   | Give the source of funding and the role of the funders for the present study and, if applicable, for the original study on which the present article is based                   | Online submission          |

\* von Elm E, Altman DG, Egger M, et al. The Strengthening the Reporting of Observational Studies in Epidemiology (STROBE) statement: guidelines for reporting observational studies. J Clin Epidemiol 2008;61(4):344-9.

This guideline can be downloaded at: <https://sites.duke.edu/xiaofeiwang/files/2016/12/Supplementary-Table-6.pdf>
